# Supplementary material for: Diversity, Daily Activity Patterns, and Pollination Effectiveness of the Insects Visiting Camellia osmantha, C. vietnamensis, and C. oleifera in South China
Source: Insects. 2019 Apr 2;10(4):98. doi: 10.3390/insects10040098 (PMC6523973; doi:10.3390/insects10040098)
Supplement: Supplementary file 1 [file insects-10-00098-s001.pdf]

## Supplementary Materials

### 1. Methods

#### 1.1. Effect of flower thinning on the fruit production rate of *C. osmantha*

*Camellia osmantha* branches with similar bud numbers were selected randomly in the fields (1 branch / tree). One-fourth, 1/3 and 1/2 of the total number of buds on the branches were removed before flowering (treatment groups). Branches with no bud removed served as a control group. There were five replicates for each treatment.

#### 1.2. Statistical analysis

Statistical analysis was performed using SPSS 16.0 (SPSS Inc., Chicago, Illinois, USA). Fruit production rate of *C. osmantha* after flower thinning and control group were analyzed by one-way analysis of variance (ANOVA), followed by Tukey's honest significant difference (HSD) test for multiple comparisons. Proportional data were subjected to arcsine square root transformation prior to analysis. A level of  $p < 0.05$  was accepted as statistically significant for all statistical analyses.

### 2. Results

#### 2.1. Effect of flower thinning on the fruit production rate of *C. osmantha*

Flower thinning had no significant effect on the fruit production rate of *C. osmantha* in comparison with control ( $F = 0.538$ ,  $df = 3,19$ ,  $p = 0.663$ ) (Table S1).

**Table S1.** Effect of flower thinning on the fruit production rate of *C. osmantha*.

|                           | Control      | 1/4         | 1/3          | 1/2           |
|---------------------------|--------------|-------------|--------------|---------------|
| Fruit production rate (%) | 48.1 ± 9.0 a | 50.3 ± 8.2a | 60.9 ± 5.7 a | 59.6 ± 11.4 a |

Values (mean ± S.E.) followed by different letters in the same row are significantly different based on Tukey's HSD test at  $p < 0.05$ .
